# Supplementary material
Source: PubMed Central journal article supplement (PMC2776250)
Supplement: mmc1.pdf [file mmc1.pdf]

Biophysical Journal, Volume 97

**Supporting Material**

**A Self-Consistent Description of the Conformational Behaviour of Chemically-Denatured Proteins from NMR and Small Angle Scattering**

Pau Bernado and Martin Blackledge

## SUPPLEMENTARY INFORMATION

### A Self-Consistent Description of the Conformational Behaviour of Chemically-Denatured Proteins from NMR and Small Angle Scattering

Pau Bernadó<sup>1\*</sup> and Martin Blackledge<sup>2\*</sup>

1 – Institute for Research in Biomedicine. c/ Baldiri Reixac, 10. 08028-Barcelona, Spain.

2 - Protein Dynamics and Flexibility. Institut de Biologie Structurale UMR 5075 CEA-CNRS-UJF. 41 Rue Jules Horowitz, Grenoble 38027 France.

Corresponding authors:

Pau Bernadó

Tel. +34 93 4037132

Fax. +34 93 4039976

Email: [pau.bernado@irbbarcelona.org](mailto:pau.bernado@irbbarcelona.org)

Martin Blackledge

Tel. +33-4-38789554

Fax. +33-4-38785494

Email: [martin.blackledge@ibs.fr](mailto:martin.blackledge@ibs.fr)

**TABLE S1.**  $R_g$ s of Intrinsically Disordered Proteins.

| <b>Protein</b>                | <b>#Residues</b> | <b><math>R_g</math></b> | <b><math>R_g^{RC}</math> <sup>a</sup></b> | <b>Ref.</b> |
|-------------------------------|------------------|-------------------------|-------------------------------------------|-------------|
| Tau ht40                      | 441              | 65±3                    | 61.0                                      | (1)         |
| Tau K32                       | 202              | 42±3                    | 40.6                                      | (1)         |
| Tau K16                       | 174              | 39±3                    | 37.5                                      | (1)         |
| Tau K18                       | 130              | 38±3                    | 32.2                                      | (1)         |
| Tau ht23                      | 352              | 53±3                    | 54.2                                      | (1)         |
| Tau K27                       | 171              | 37±2                    | 37.2                                      | (1)         |
| Tau K17                       | 143              | 36±2                    | 33.9                                      | (1)         |
| Tau K19                       | 99               | 35±1                    | 28.0                                      | (1)         |
| Tau K44                       | 283              | 52±2                    | 48.4                                      | (1)         |
| Tau K10                       | 167              | 40±1                    | 36.7                                      | (1)         |
| Tau K25                       | 185              | 41±2                    | 38.7                                      | (1)         |
| Tau K23                       | 254              | 49±2                    | 45.7                                      | (1)         |
| Tau K32 AT8 AT100             | 202              | 41±3                    | 40.6                                      | (1)         |
| Tau ht23 S214E                | 352              | 54±3                    | 54.2                                      | (1)         |
| Tau ht23 AT8 AT100            | 352              | 52±3                    | 54.2                                      | (1)         |
| Tau K18 P301L                 | 130              | 35±2                    | 32.2                                      | (1)         |
|                               |                  |                         |                                           |             |
| Prothymosin $\alpha$ , pH 7.5 | 109              | 37.8±0.9                | 29.4                                      | (2)         |
| Prothymosin $\alpha$ , pH 2.5 | 109              | 27.6±0.9                | 29.4                                      | (2)         |
| $\alpha$ -Synuclein, pH 7.5   | 140              | 40±1                    | 33.5                                      | (3)         |
| $\alpha$ -Synuclein, pH 3.0   | 140              | 30±1                    | 33.5                                      | (3)         |
| PIR domain                    | 75               | 26.5±0.5                | 24.2                                      | (4)         |
| N-tail nucleoprotein MV       | 139              | 27.2±0.5                | 33.4                                      | (5)         |
| p53 (1-93)                    | 93               | 28.7±0.3                | 27.1                                      | (6)         |
| Neuroigin 3                   | 118              | 31.5±1.0                | 30.6                                      | (7)         |
| Ki-1/57                       | 292              | 47.5±1.0                | 49.2                                      | (8)         |
| Msh6 N-term                   | 304              | 56±2                    | 50.2                                      | (9)         |
| Pig Calpastatin domain I      | 148              | 35.4                    | 34.5                                      | (10)        |
| HrpO                          | 147              | 35.0                    | 34.4                                      | (11)        |

a- Threshold  $R_g$  value obtained from the parametrization of Flory's relationship with the coil database.

## REFERENCES

- (1) Mylonas, E., A. Hascher, P. Bernadó, M. Blackledge, E. Mandelkow, and D. I. Svergun. 2008. Domain conformation of tau protein studied by solution small-angle X-ray scattering. *Biochemistry*, **47**:10345-10353.
- (2) Uversky, V. N., J. R. Gillespie, I. S. Millett, A. V. Khodyakova, A. M. Vasiliev, T. V. Chernovskaya, R. N. Vasilenko, G. D. Kozlovskaya, D. A. Dolgikh, A. L. Fink, S. Doniach, and V. M. Abramov. 1999. Natively unfolded human prothymosin  $\alpha$  adopts partially folded collapsed conformation at acidic pH. *Biochemistry* **38**:15009-15016.
- (3) Li, J., V. N. Uversky, and A. L. Fink. 2002. Conformational behavior of human  $\alpha$ -synuclein is modulated by familial Parkinson's disease point mutations A30P and A53T. *NeuroToxicology* **23**:553-567.
- (4) Moncoq, K., I. Broutin, C. T. Craescu, P. Vachette, A. Ducruix, and D. Durand. 2004. SAXS study of the PIR domain from the Grb14 molecular adaptor: A natively unfolded protein with transient structure primer? *Biophys J* **87**:4056-4064.
- (5) Longhi, S., V. Receveur-Brechot, D. Karlin, K. Johansson, H. Darbon, D. Bhella, R. Yeo, S. Finet, and B. Canard. 2003. The C-terminal domain of the measles virus nucleoprotein is intrinsically disordered and folds upon binding to the C-terminal moiety of the phosphoprotein. *J Biol Chem* **278**:18638-18648.
- (6) Wells, M, H. Tidow, T. J. Rutherford, P. Markwick, M. R. Jensen, E. Mylonas, D. I. Svergun, M. Blackledge, and A. R. Fersht. 2008. Structure of tumor suppressor p53 and its intrinsically disordered N-terminal transactivation domain. *Proc Natl Acad Sci USA* **105**:5762-5767.
- (7) Paz, A., T. Zeev-Ben-Mordehai, M. Lundqvist, E. Sherman, E. Mylonas, L. Weiner, G. Haran, D. I. Svergun, F. A. A. Mulder, J. L. Sussman, and I. Silman. 2008. Biophysical characterization of the unstructured cytoplasmic domain of the human neuronal adhesion protein neuroligin 3. *Biophys J* **95**:1928-1944.
- (8) Bressan, G. C., J. C. Silva, J. C. Borges, D. O. dos Passos, C. H. I. Ramos, I. L. Torriani, and J. Kobarg. 2008. Human regulatory protein Ki-1/57 has characteristics of an intrinsically unstructured protein. *J Proteome Res* **7**:4465-4474.
- (9) Shell, S. S., C. D. Putnam, and R. D. Kolodner. 2007. The N terminus of *Saccharomyces cerevisiae* Msh6 is an unstructured tether to PCNA. *Mol Cell* **26**:565-578.

- (10) Konno, T., N. Tanaka, M. Kataoka, E. Takano, and M. Maki. 1997. A circular dichroism study of preferential hydration and alcohol effects on a denatured protein, pig calpastatin domain I. *Biochim Biophys Acta* **1342**:73-82.
- (11) Gazi, A. D., M. Bastaki, S. N. Charola, E. A. Gkougkoulia, E. A. Kapellios, N. J. Panopoulos, and M. Kokkinidis. 2008. Evidence for a coiled-coil interaction mode of disordered proteins from bacterial type III secretion systems. *J Biol Chem* **283**:34062-34068.
